# Supplementary material for: Long-distance texting: Text messaging is linked with higher relationship satisfaction in long-distance relationships
Source: PubMed Central journal article supplement — J Soc Pers Relat. 2021 Nov 14;38(12):3543–65. doi: 10.1177/02654075211043296 (PMC8669216; doi:10.1177/02654075211043296), 2021-11-14
Supplement: sj-pdf-1-spr-10.1177_02654075211043296.pdf [file sj-pdf-1-spr-10.1177_02654075211043296.pdf]

## Appendix

Table S1

*Effects of Frequency of Remote Communication and LDR Status on Relationship Satisfaction – Outlier Adjusted*

| Variable                             | Model 1  |           | Model 2  |           | Model 3  |           |
|--------------------------------------|----------|-----------|----------|-----------|----------|-----------|
|                                      | <i>b</i> | <i>SE</i> | <i>b</i> | <i>SE</i> | <i>b</i> | <i>SE</i> |
| Fixed effects                        |          |           |          |           |          |           |
| Intercept                            | 29.57*** | .25       | 29.70*** | .25       | 29.57*** | .26       |
| LDR status (LDR = 1, GCR = 0)        | -.24     | .41       | -.58     | .45       | -.80     | .46       |
| Video calling frequency              |          |           | .04      | .17       | -.26     | .21       |
| Voice calling frequency              |          |           | .47*     | .19       | .82**    | .24       |
| Texting frequency                    |          |           | .68*     | .28       | .16      | .35       |
| LDR status X video calling frequency |          |           |          |           | .74*     | .34       |
| LDR status X voice calling frequency |          |           |          |           | -.87*    | .40       |
| LDR status X texting frequency       |          |           |          |           | 1.41*    | .58       |
|                                      |          | Estimate  |          | Estimate  |          | Estimate  |
| Fit statistics                       |          |           |          |           |          |           |
| Adjusted R square                    |          | -.001     |          | .020      |          | .035      |
| F change                             |          | .34       |          | 5.56**    |          | 4.41**    |

\* $p < .05$ , \*\* $p < .01$ , \*\*\* $p < .001$

**Table S2***Effects of Responsiveness of Remote Communication and LDR Status on Relationship**Satisfaction – Outlier Adjusted*

| Variable                             | Model 1  |           | Model 2  |           | Model 3  |           |
|--------------------------------------|----------|-----------|----------|-----------|----------|-----------|
|                                      | <i>b</i> | <i>SE</i> | <i>b</i> | <i>SE</i> | <i>b</i> | <i>SE</i> |
| Fixed effects                        |          |           |          |           |          |           |
| Intercept                            | 29.57*** | .25       | 29.76*** | .25       | 29.76*** | .24       |
| LDR status (LDR = 1, GCR = 0)        | -.24     | .41       | -.74     | .40       | -.78     | .40       |
| Video calling frequency              |          |           | .39*     | .17       | .39      | .21       |
| Voice calling frequency              |          |           | 1.07***  | .23       | 1.20***  | .29       |
| Texting frequency                    |          |           | .42      | .22       | .28      | .23       |
| LDR status X video calling frequency |          |           |          |           | -.14     | .38       |
| LDR status X voice calling frequency |          |           |          |           | -.30     | .46       |
| LDR status X texting frequency       |          |           |          |           | 1.10*    | .45       |
|                                      |          | Estimate  |          | Estimate  |          | Estimate  |
| Fit statistics                       |          |           |          |           |          |           |
| Adjusted R square                    |          | -.001     |          | .093      |          | .098      |
| F change                             |          | .34       |          | 23.36***  |          | 2.13      |

\* $p < .05$ , \*\* $p < .01$ , \*\*\* $p < .001$
